# Supplementary material for: Feasibility of an innovative electronic mobile system to assist health workers to collect accurate, complete and timely data in a malaria control programme in a remote setting in Kenya
Source: Springer Nature journal article supplement (doi:10.1186/s12936-015-0965-z), 2015-11-03
Supplement: MOESM1 [file 9761792]

## Appendix 1

### Usability Survey

#### PART A

Instructions: For each of the following statements, mark one box:

#### *User Interface*

|                                                                              | Very                     | Somewhat                 | A little                 | Not at all               | Don't know               |
|------------------------------------------------------------------------------|--------------------------|--------------------------|--------------------------|--------------------------|--------------------------|
| 1. Did you find the User Manual easy to follow?                              | <input type="checkbox"/> | <input type="checkbox"/> | <input type="checkbox"/> | <input type="checkbox"/> | <input type="checkbox"/> |
| 2. Did you understand the warning and caution statements in the User Manual? | <input type="checkbox"/> | <input type="checkbox"/> | <input type="checkbox"/> | <input type="checkbox"/> | <input type="checkbox"/> |
| 3. Did you understand the biohazard precautions in the User Manual?          | <input type="checkbox"/> | <input type="checkbox"/> | <input type="checkbox"/> | <input type="checkbox"/> | <input type="checkbox"/> |
| 4. Did you understand the Training Requirements section of the User Manual?  | <input type="checkbox"/> | <input type="checkbox"/> | <input type="checkbox"/> | <input type="checkbox"/> | <input type="checkbox"/> |
| 5. Was the stylus helpful when using the reader?                             | <input type="checkbox"/> | <input type="checkbox"/> | <input type="checkbox"/> | <input type="checkbox"/> | <input type="checkbox"/> |
| 6. Did you find it easy to type on the reader?                               | <input type="checkbox"/> | <input type="checkbox"/> | <input type="checkbox"/> | <input type="checkbox"/> | <input type="checkbox"/> |
| 7. Did you understand the icons on the screen?                               | <input type="checkbox"/> | <input type="checkbox"/> | <input type="checkbox"/> | <input type="checkbox"/> | <input type="checkbox"/> |
| 8. Was it easy to insert and remove RDTs from the reader?                    | <input type="checkbox"/> | <input type="checkbox"/> | <input type="checkbox"/> | <input type="checkbox"/> | <input type="checkbox"/> |
| 9. Were the instructions for charging the reader easy to understand?         | <input type="checkbox"/> | <input type="checkbox"/> | <input type="checkbox"/> | <input type="checkbox"/> | <input type="checkbox"/> |

10. Did you find it easy to log **into** the reader?

|  |  |  |  |  |
|--|--|--|--|--|
|  |  |  |  |  |
|--|--|--|--|--|

11. Did you find it easy to log **out** of the reader?

|  |  |  |  |  |
|--|--|--|--|--|
|  |  |  |  |  |
|--|--|--|--|--|

12. Did you find it easy to perform a Functional Check?

|  |  |  |  |  |
|--|--|--|--|--|
|  |  |  |  |  |
|--|--|--|--|--|

13. Did you find the reader easy to clean?

|  |  |  |  |  |
|--|--|--|--|--|
|  |  |  |  |  |
|--|--|--|--|--|

14. Was the reader easy to carry?

|  |  |  |  |  |
|--|--|--|--|--|
|  |  |  |  |  |
|--|--|--|--|--|

### **Workflow**

**Very      Somewhat      A little      Not at all      Don't know**

1. Were the onscreen prompts clear and easy to follow?

|  |  |  |  |  |
|--|--|--|--|--|
|  |  |  |  |  |
|--|--|--|--|--|

2. Did the reader guide your RDT workflow?

|  |  |  |  |  |
|--|--|--|--|--|
|  |  |  |  |  |
|--|--|--|--|--|

3. Did the reader help in patient management and capturing patient information?

|  |  |  |  |  |
|--|--|--|--|--|
|  |  |  |  |  |
|--|--|--|--|--|

4. Did the reader help you to keep track of multiple patients and/or tests?

|  |  |  |  |  |
|--|--|--|--|--|
|  |  |  |  |  |
|--|--|--|--|--|

5. Was the timer on the reader helpful?

|  |  |  |  |  |
|--|--|--|--|--|
|  |  |  |  |  |
|--|--|--|--|--|

6. Did the timer beep help you analyse RDTs on time?

|  |  |  |  |  |
|--|--|--|--|--|
|  |  |  |  |  |
|--|--|--|--|--|

7. Did you find it easy to clear a patient from the Patient Manager list (i.e., complete a patient test)?

|  |  |  |  |  |
|--|--|--|--|--|
|  |  |  |  |  |
|--|--|--|--|--|

**Test Results**

**Very      Somewhat      A little      Not at all      Don't know**

1. Were the test results easy to read?

|  |  |  |  |  |
|--|--|--|--|--|
|  |  |  |  |  |
|--|--|--|--|--|

2. Did you understand the test results?

|  |  |  |  |  |
|--|--|--|--|--|
|  |  |  |  |  |
|--|--|--|--|--|

3. Did you find the Deki Reader useful?

|  |  |  |  |  |
|--|--|--|--|--|
|  |  |  |  |  |
|--|--|--|--|--|

**PART B**

**Instructions:** Please answer the following questions about the Deki Reader features.

1. What features of the reader did you like the best?

.....  
.....

2. If you could change anything about the reader, what would it be?

.....  
.....

3. Please provide any additional comments about the reader.

.....  
.....
